# Supplementary material
Source: bioRxiv or medRxiv preprint supplement (https://www.biorxiv.org/highwire/filestream/50111/field_highwire_adjunct_files/3/037762-4.pdf)
Supplement: Supplementary file [file 037762-4.pdf]

TagMap  
Tn5 Tagmentation-based pBac mapping  
David L. Stern  
June 22, 2016

## Protocol - Preliminaries

### **1 - Anneal the oligonucleotides**

Combine:

#### Rx1 (adapter 1 10 uM)

10uL Tn5ME-A (100 uM)  
10uL Tn5MErev-InT (100 uM)  
80uL Reassociation Buffer

Mix well.

Anneal primers in a thermal cycler with the following Reassociation Program

| Step | Temp                              | Time   |
|------|-----------------------------------|--------|
| 1    | 95°C                              | 10 min |
| 2    | 90°C                              | 1 min  |
| 3    | Reduce temp by 1°C/cycle 60 times |        |
| 4    | 4°C                               | Hold   |

### **2 - Dilute Tn5 to 20ng/uL**

e.g.  
1 uL Tn5 protein (200 ng / uL)  
9 uL Reassociation buffer

Mix well by pipetting 10 times.

### **3 - Dilute the adaptors.**

1 uL Adaptor 1 (10 uM)  
9 uL H2O

Mix by pipetting 10 times.

#### **4 - Pre-charge the Tn5**

Combine, in the following order, mix after each addition:

21 uL Tn5 (20 ng / uL)

10 uL Glycerol

10 uL Diluted Adaptors (1uM)

Pre-charge at 37°C for 30 minutes

#### **5 - Tagment**

Combine:

1 uL Precharged Tn5

1 uL DNA (10 ng / uL *or less!*)

2 uL 5 X TAPS

6 uL H<sub>2</sub>O

Mix well by pipetting up and down 10 X.

Incubate at 55°C for 7 minutes.

#### **6 - Kill the Tn5**

Add to each reaction:

2.5 uL 0.2% SDS

Incubate at 55° 7 min

## 7 - PCR 1

1uL Tagmentation reaction  
1uL 5uM Tn5ME-B-pBac-142R  
1uL 5uM Tn5ME-B-pBac-3287F  
1uL 5uM A\_idx\_i5 primer  
1uL 4 mM dNTP  
4uL 5X Phusion Reaction Buffer  
0.5uL Phusion Polymerase  
10.5uL H<sub>2</sub>O

### Thermocycler settings

| Step | Temp                     | Time   |
|------|--------------------------|--------|
| 1    | 95°C                     | 5 min  |
| 1    | 95°C                     | 15 sec |
| 2    | 61°C                     | 15 sec |
| 3    | 72°C                     | 1 min  |
| 4    | Cycle to step 3 17 times |        |
| 5    | 72°C                     | 2 min  |
| 6    | 4°C                      | Hold   |

## 8 - PCR 2

1 uL PCR1 Reaction  
1 uL 10 uM Primer 1 - Tn5-Illumina-Primer1 (FC2)  
1 uL 10 uM Primer 2 - i7\_idx-primer  
1 uL dNTPs  
4 uL Phusion 5X Buffer  
0.5uL Phusion Polymerase  
11.5uL H<sub>2</sub>O

Cycle 12 times with same thermocycler settings as PCR 1

## 12 - Clean up product - Ampure

Pool 10uL of each reaction

0.5 X Ampure (e.g. 50ul / 100uL library)

Incubate 1 min

Separate on magnet

Keep supernatant, discard beads

Add 0.35 X Ampure (e.g. 35ul/ 100uL original library. Total volume 185uL)

Separate on Magnet

Wash 2X 80% Ethanol

Dry beads 5 min on magnet

Resuspend in water

Separate on magnet, keep 95% of liquid

### **13 - Quantify final library**

Reassociation Buffer – *store at R.T.*

10 mM Tris pH 8.0

50 mM NaCl

1 mM EDTA

5x TAPS-DMF buffer from Picelli paper

50 mM TAPS-NaOH,

25 mM MgCl<sub>2</sub>,

50% v/v DMF (pH 8.5) at 25°C

-100 g TAPS in 500 ml H<sub>2</sub>O, pH = 9.9 -Add 5-10 ml concentrate HCl to get to pH 8.5

-complete to 754 ml for 500mM (Paper says TAPS-NaOH but I added HCl instead)
